# Supplementary material for: Isolation of muscle stem cells from rat skeletal muscles
Source: bioRxiv or medRxiv preprint supplement (doi:10.1101/690776), 2019-07-02

**a**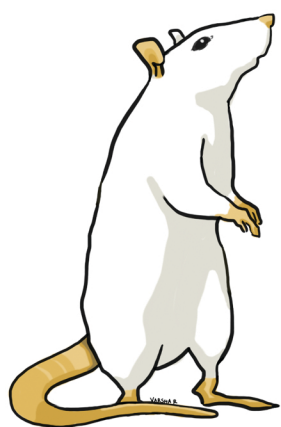**HIND LIMB  
MUSCLES****ANTIBODY  
TESTING****b**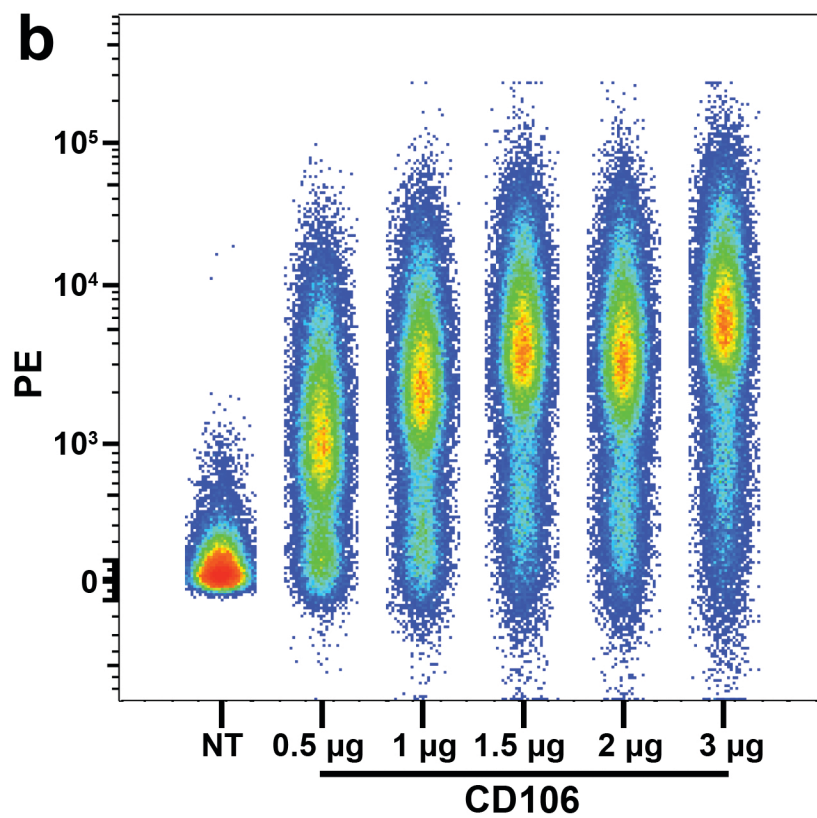**c**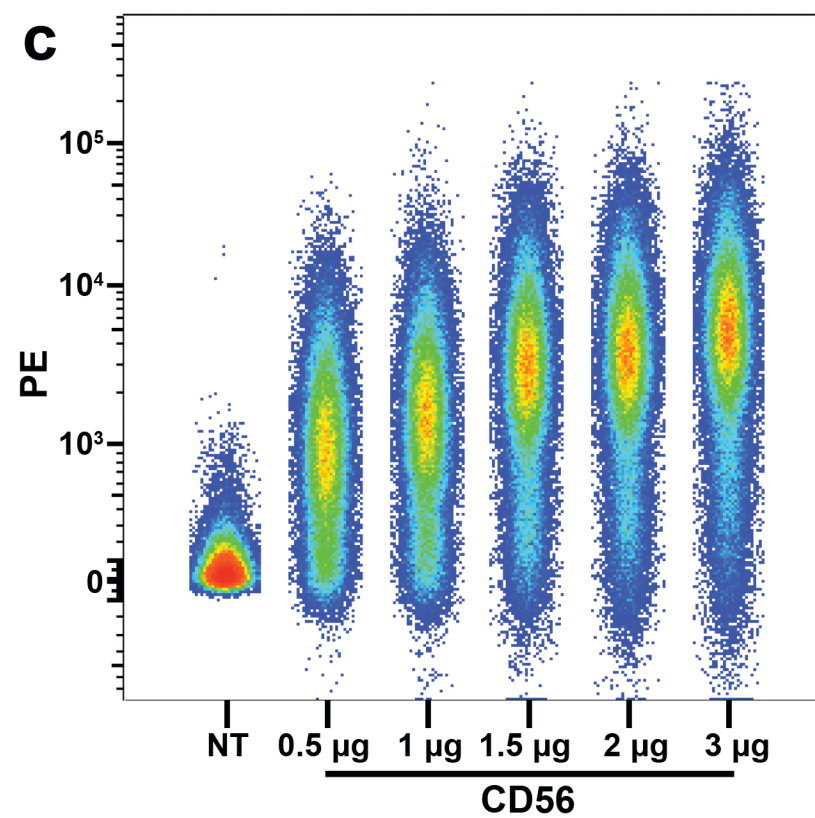**d**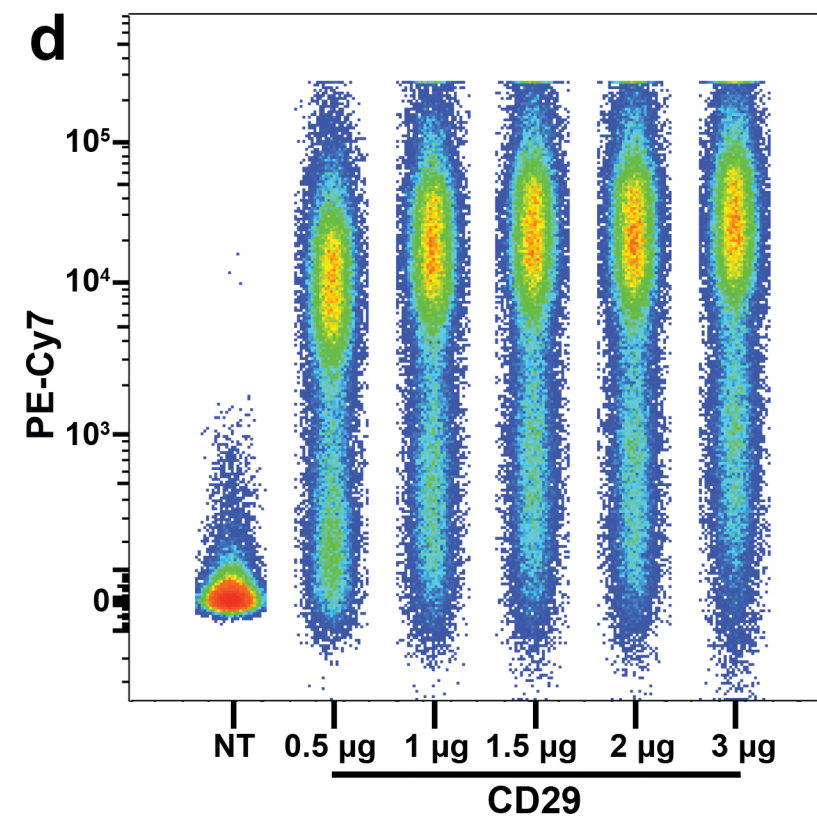**e**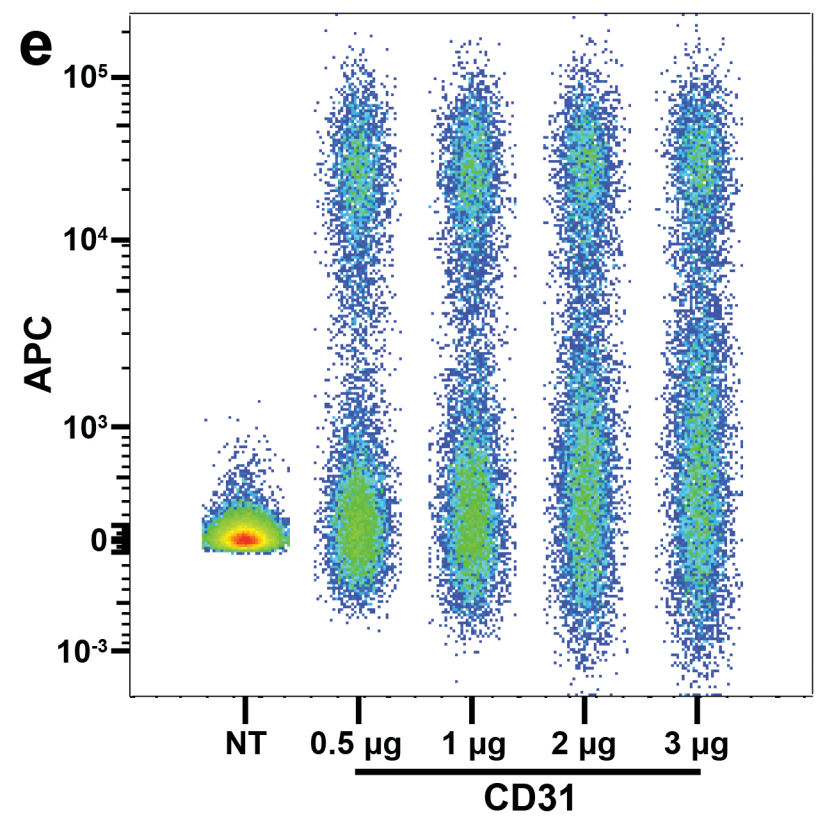**f**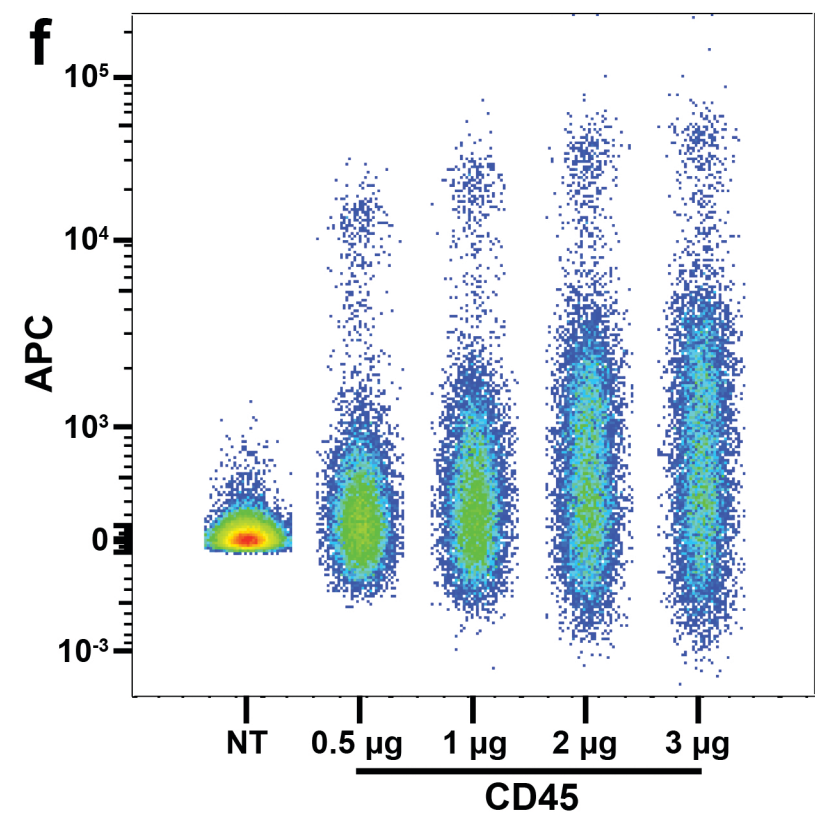**g**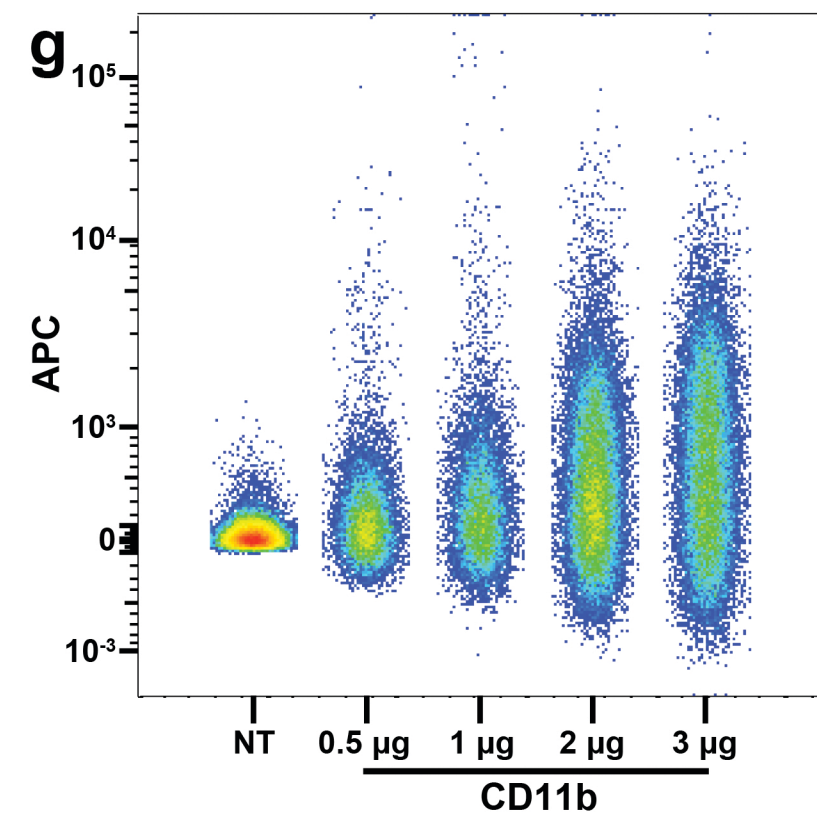**h**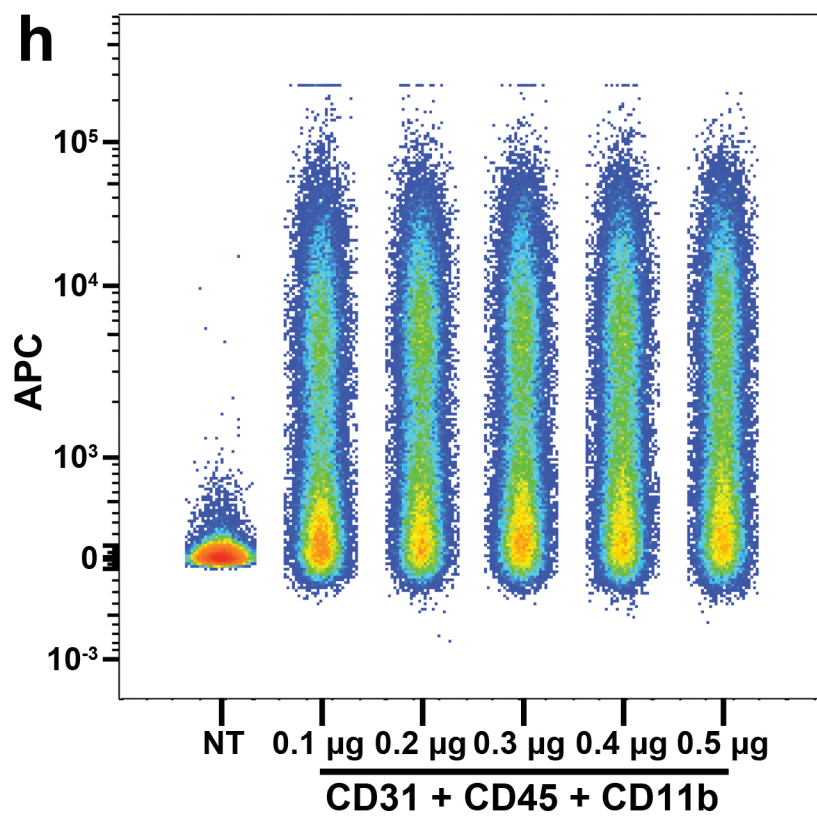

Supplement: Supplementary file [file media-2.pdf]
