# Supplementary material for: Isolation of muscle stem cells from rat skeletal muscles
Source: bioRxiv or medRxiv preprint supplement (doi:10.1101/690776), 2019-07-02

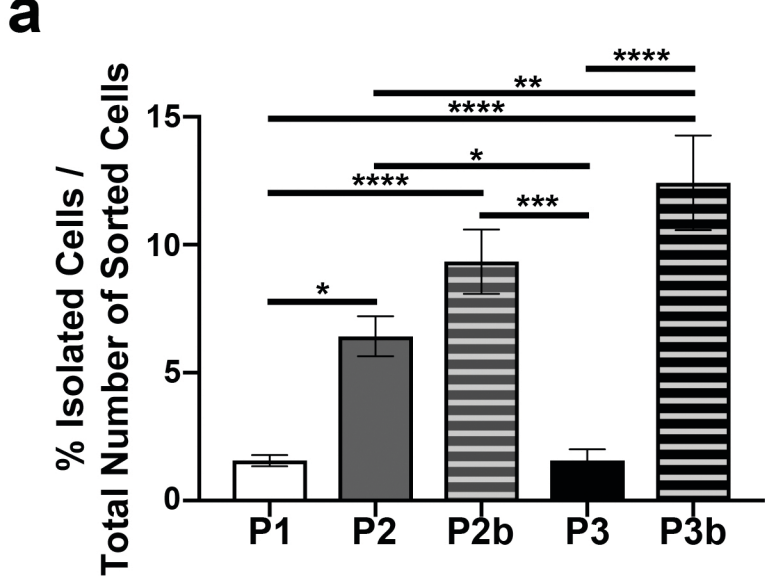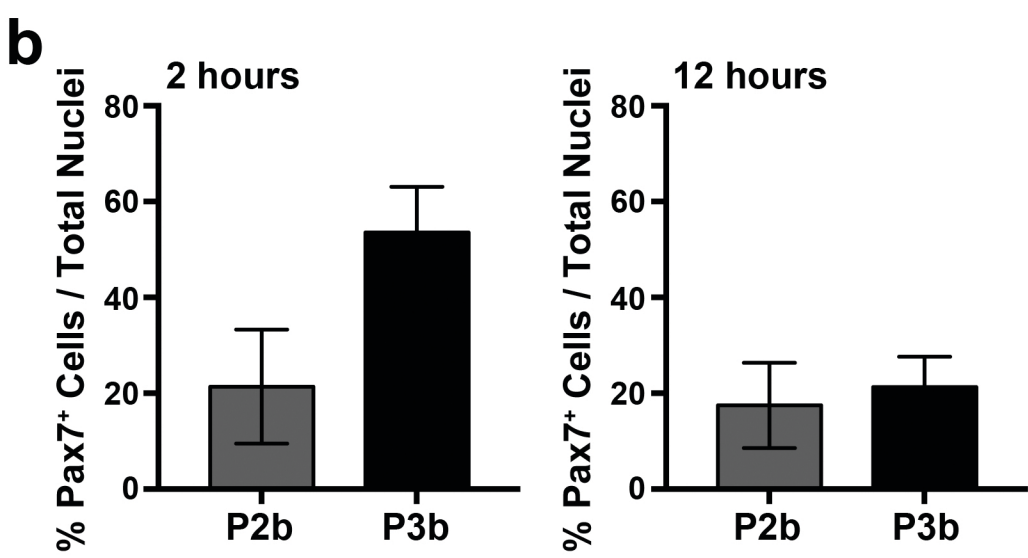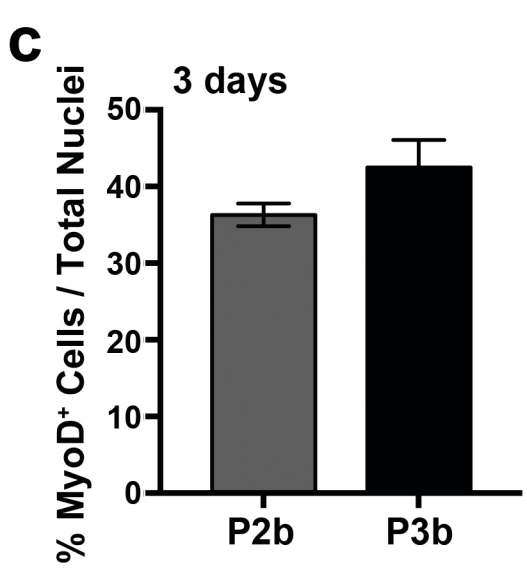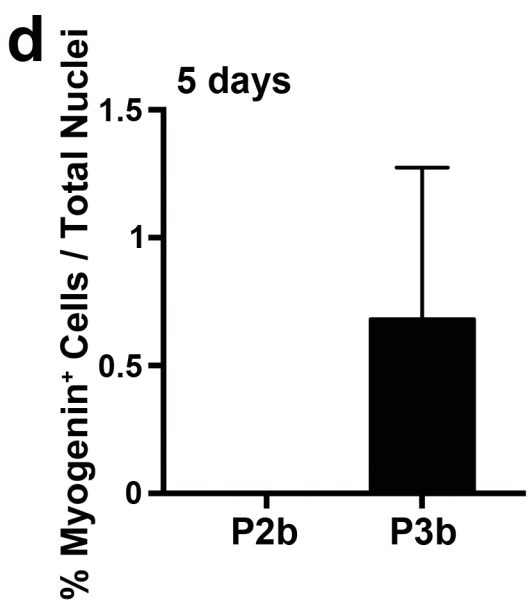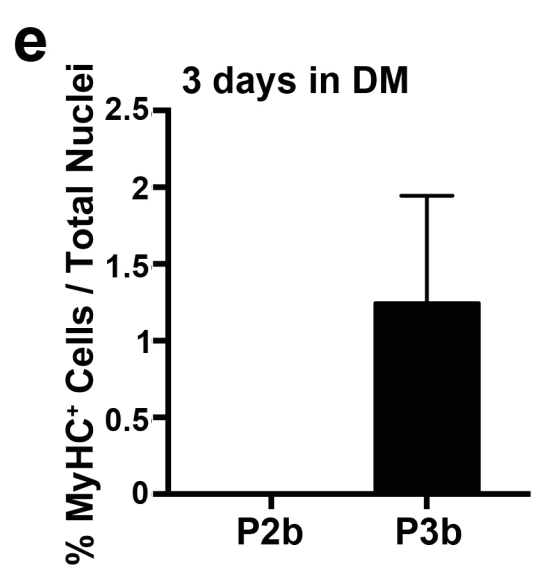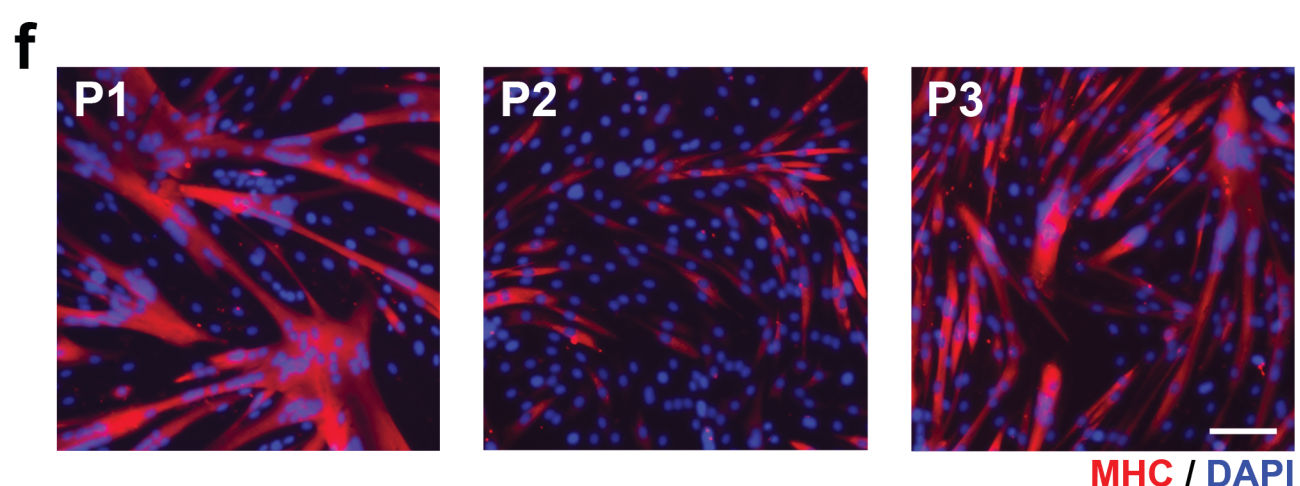

Supplement: Supplementary file [file media-3.pdf]
